# Supplementary material for: Nutrition and Rheumatoid Arthritis Onset: A Prospective Analysis Using the UK Biobank
Source: MDPI journal article supplement (doi:10.3390/nu14081554), 2022-04-08
Supplement: s1 [file s1]

# Supplementary Materials

**Table S1.** Distribution of missing values overall and by disease status.

| Variable                            | Overall<br>N (%) | RA              |              |
|-------------------------------------|------------------|-----------------|--------------|
|                                     |                  | No<br>N (%)     | Yes<br>N (%) |
| Sex                                 | 0 (0.00)         | 0 (0.00)        | 0 (0.00)     |
| Age                                 | 0 (0.00)         | 0 (0.00)        | 0 (0.00)     |
| Area                                | 0 (0.00)         | 0 (0.00)        | 0 (0.00)     |
| Townsend deprivation index          | 595 (0.12)       | 592 (0.12)      | 3 (0.11)     |
| Smoking                             | 1,957 (0.41)     | 1,942 (0.41)    | 15 (0.53)    |
| BMI                                 | 2,498 (0.52)     | 2,466 (0.52)    | 32 (1.14)    |
| Moderate/vigorous physical activity | 10,364 (2.16)    | 10,237 (2.15)   | 127 (4.51)   |
| Type II diabetes                    | 0 (0.00)         | 0 (0.00)        | 0 (0.00)     |
| Hypertension                        | 0 (0.00)         | 0 (0.00)        | 0 (0.00)     |
| Hypercholesterolemia                | 0 (0.00)         | 0 (0.00)        | 0 (0.00)     |
| Other autoimmune diseases           | 0 (0.00)         | 0 (0.00)        | 0 (0.00)     |
| Cooked vegetables                   | 6,345 (1.32)     | 6,296 (1.32)    | 49 (1.74)    |
| Salad/vegetables                    | 6,583 (1.37)     | 6,530 (1.37)    | 53 (1.88)    |
| Fresh fruit                         | 2,227 (0.46)     | 2,209 (0.46)    | 18 (0.64)    |
| Oily fish                           | 3,004 (0.63)     | 2,978 (0.62)    | 26 (0.92)    |
| Other fish                          | 2,648 (0.55)     | 2,631 (0.55)    | 17 (0.60)    |
| Processed meat                      | 1,233 (0.26)     | 1,226 (0.26)    | 7 (0.25)     |
| Chicken, turkey or other poultry    | 1,122 (0.23)     | 1,117 (0.23)    | 5 (0.18)     |
| Beef                                | 2,258 (0.47)     | 2,245 (0.47)    | 13 (0.46)    |
| Lamb/mutton                         | 3,388 (0.71)     | 3,358 (0.70)    | 30 (1.06)    |
| Pork                                | 3,187 (0.66)     | 3,160 (0.66)    | 27 (0.96)    |
| Cheese                              | 1,541 (0.32)     | 1,533 (0.32)    | 8 (0.28)     |
| Bread                               | 5,826 (1.22)     | 5,770 (1.21)    | 56 (1.99)    |
| Breakfast cereals                   | 1,955 (0.41)     | 1,944 (0.41)    | 11 (0.39)    |
| Alcohol consumption                 | 580 (0.12)       | 573 (0.12)      | 7 (0.25)     |
| Tea                                 | 1,209 (0.25)     | 1,200 (0.25)    | 9 (0.32)     |
| Coffee                              | 1,263 (0.26)     | 1,248 (0.26)    | 15 (0.53)    |
| Coffee type                         | 107,358 (22.39)  | 106,619 (22.37) | 739 (26.21)  |

RA: Rheumatoid Arthritis.
